# Supplementary material for: Pyridyne radical cations produced by photodissociation of Mg˙+(multifluoro-pyridine) complexes: A combined experimental and theoretical study
Source: Royal Society of Chemistry journal article supplement (doi:10.1039/b614445d), 2006-12-15
Supplement: b614445d.pdf [file b614445d.pdf]

## Supporting Information

(All calculations were performed at the B3LYP/6-31+G\*\* level unless otherwise specified.)

S-1. Geometries and Cartesian coordinates of  $\text{Mg}^+(2,6\text{-C}_5\text{H}_3\text{F}_2\text{N})$  and  $\text{Mg}^+(\text{C}_5\text{F}_5\text{N})$ . Relative energies of isomers are also shown for  $\text{Mg}^+(\text{C}_5\text{F}_5\text{N})$ .

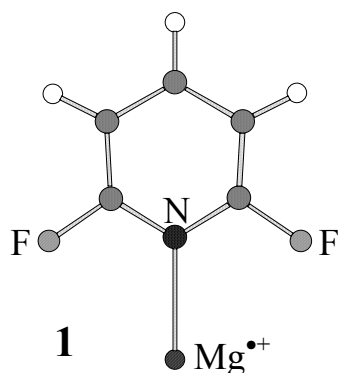

**1**  
 $\text{Mg}^+(2,6\text{-C}_5\text{H}_3\text{F}_2\text{N})$

|    |           |           |          |
|----|-----------|-----------|----------|
| C  | 1.139511  | -0.130661 | 0.000000 |
| N  | -0.000046 | -0.832687 | 0.000000 |
| C  | -1.140396 | -0.131989 | 0.000000 |
| C  | -1.217209 | 1.247482  | 0.000000 |
| C  | -0.001617 | 1.940170  | 0.000000 |
| C  | 1.214706  | 1.248825  | 0.000000 |
| F  | -2.240555 | -0.893860 | 0.000000 |
| F  | 2.240555  | -0.891251 | 0.000000 |
| Mg | 0.001236  | -3.025284 | 0.000000 |
| H  | -2.179382 | 1.744629  | 0.000000 |
| H  | -0.002213 | 3.025284  | 0.000000 |
| H  | 2.176346  | 1.746933  | 0.000000 |

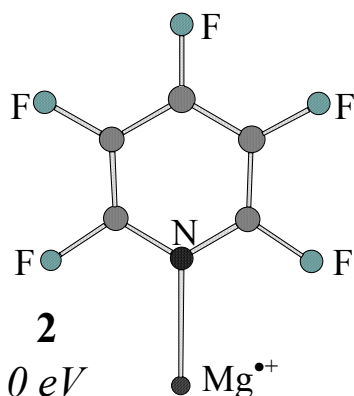

**2**  
 0 eV

$\text{Mg}^+(\text{C}_5\text{F}_5\text{N})$

$\text{Mg}^+$  linked to N

|    |           |           |           |
|----|-----------|-----------|-----------|
| C  | 1.209427  | 1.134003  | 0.133636  |
| C  | 1.141754  | -0.247879 | 0.027100  |
| N  | -0.006622 | -0.922821 | -0.069427 |
| C  | -1.151657 | -0.235397 | -0.063446 |
| C  | -1.212479 | 1.147141  | 0.038010  |
| C  | 0.000168  | 1.842575  | 0.138641  |
| F  | 2.247803  | -0.985703 | 0.015762  |
| F  | -2.261261 | -0.961151 | -0.162292 |
| F  | -2.368500 | 1.788269  | 0.040024  |
| F  | 0.003479  | 3.151733  | 0.237167  |
| F  | 2.368515  | 1.762573  | 0.227081  |
| Mg | -0.012070 | -3.151733 | -0.237183 |

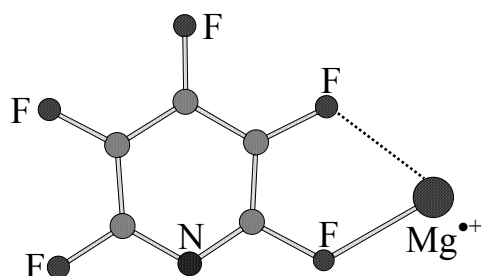

**2a** + 0.48 eV

$\text{Mg}^+(\text{C}_5\text{F}_5\text{N})$

$\text{Mg}^+$  linked to 2,3- F

|    |           |           |           |
|----|-----------|-----------|-----------|
| C  | 0.247147  | 0.068604  | -0.015930 |
| C  | 0.183182  | -1.304855 | -0.003311 |
| C  | -0.958344 | 0.770584  | -0.000839 |
| F  | 1.472916  | 0.684036  | -0.042435 |
| N  | -0.893158 | -2.021378 | 0.021439  |
| C  | -2.143097 | 0.025131  | 0.026047  |
| F  | 1.421509  | -1.967346 | -0.019333 |
| F  | -0.979004 | 2.088928  | -0.011536 |
| C  | -2.047165 | -1.374817 | 0.036118  |
| F  | -3.314697 | 0.637421  | 0.041275  |
| Mg | 3.314713  | -0.883606 | -0.061371 |
| F  | -3.153427 | -2.088928 | 0.061356  |

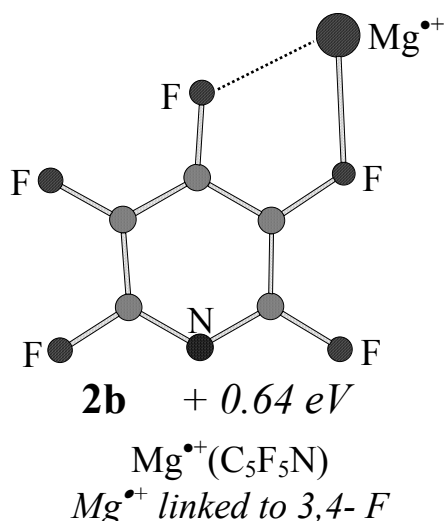

|    |           |           |           |
|----|-----------|-----------|-----------|
| C  | 0.002182  | 0.242508  | 0.001160  |
| C  | 1.203888  | -0.447784 | -0.019623 |
| C  | -1.205078 | -0.436295 | 0.020416  |
| F  | 0.074463  | 1.609085  | 0.001541  |
| C  | 1.180267  | -1.834244 | -0.020828 |
| C  | -1.102951 | -1.838500 | 0.017075  |
| F  | 2.365387  | 0.313828  | -0.038055 |
| F  | -2.365372 | 0.203659  | 0.040451  |
| N  | 0.040192  | -2.488235 | -0.002609 |
| F  | 2.312988  | -2.516037 | -0.040436 |
| F  | -2.217300 | -2.544144 | 0.034851  |
| Mg | 2.273010  | 2.544159  | -0.033951 |

## S-2. Geometries and Cartesian coordinates of selected transition states and intermediates for the complexes **1** and **2**.

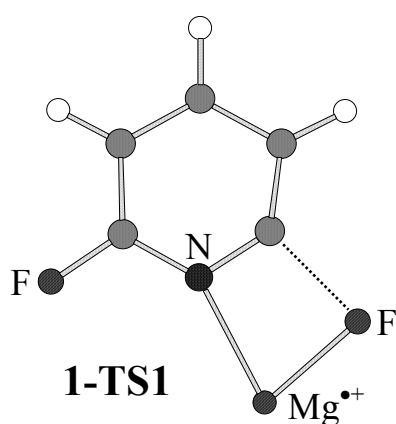

|    |           |           |           |
|----|-----------|-----------|-----------|
| N  | -0.080490 | -0.958481 | 0.000732  |
| C  | -1.246719 | -0.288879 | 0.000732  |
| C  | -1.276886 | 1.099640  | 0.000732  |
| C  | -0.056900 | 1.788422  | 0.000900  |
| C  | 1.176804  | 1.102631  | 0.000992  |
| C  | 0.995270  | -0.249969 | 0.000641  |
| F  | 2.345810  | -1.634964 | -0.000885 |
| Mg | 0.922119  | -2.875443 | -0.001022 |
| F  | -2.345810 | -1.022873 | 0.000671  |
| H  | -2.229416 | 1.615936  | 0.000656  |
| H  | -0.057922 | 2.875443  | 0.000916  |
| H  | 2.142273  | 1.593170  | 0.001007  |

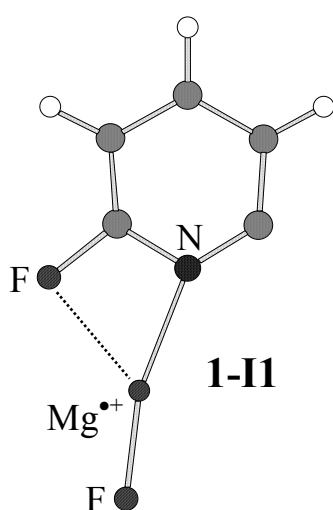

|    |           |           |           |
|----|-----------|-----------|-----------|
| C  | 1.147430  | 0.612350  | 0.001358  |
| N  | 0.026413  | -0.086975 | 0.001358  |
| C  | -1.112396 | 0.621460  | 0.001358  |
| C  | -1.208984 | 1.990204  | 0.001297  |
| C  | 0.016113  | 2.680634  | 0.001282  |
| C  | 1.238495  | 1.988220  | 0.001343  |
| Mg | -0.744827 | -2.039261 | 0.001266  |
| F  | -0.955490 | -3.767044 | -0.001419 |
| F  | -2.193039 | -0.225372 | 0.001419  |
| H  | -2.169907 | 2.490875  | 0.001282  |
| H  | 0.015274  | 3.767029  | 0.001236  |
| H  | 2.193039  | 2.501282  | 0.001358  |

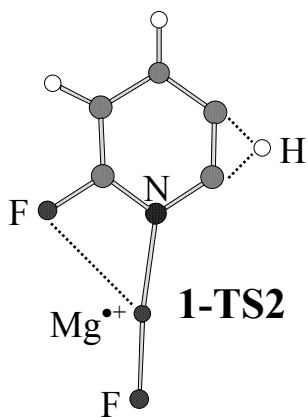

|    |           |           |           |
|----|-----------|-----------|-----------|
| C  | -1.061127 | 0.682419  | 0.297745  |
| N  | 0.028671  | -0.086319 | 0.162582  |
| C  | 1.177429  | 0.660568  | 0.202347  |
| C  | 1.224136  | 1.982468  | 0.189377  |
| C  | 0.076126  | 2.794525  | 0.103745  |
| C  | -1.113159 | 2.083405  | 0.279556  |
| Mg | -0.256180 | -2.130615 | 0.111481  |
| F  | -0.313202 | -3.865082 | -0.027313 |
| F  | -2.192551 | -0.027023 | 0.414169  |
| H  | 0.086456  | 3.865067  | -0.071838 |
| H  | -2.081512 | 2.568878  | 0.343216  |
| H  | 2.192566  | 1.249084  | -0.414169 |

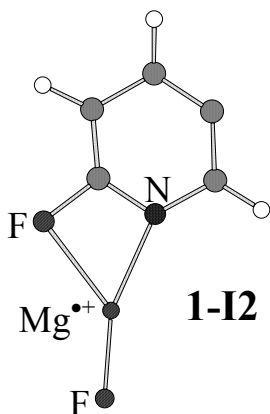

|    |           |           |           |
|----|-----------|-----------|-----------|
| C  | 1.243179  | 0.557281  | -0.000427 |
| C  | 1.190735  | 1.928894  | -0.000427 |
| C  | 0.031631  | 2.680649  | -0.000443 |
| C  | -1.187286 | 1.977066  | -0.000458 |
| C  | -1.058777 | 0.604706  | -0.000488 |
| N  | 0.056503  | -0.114304 | -0.000443 |
| Mg | -0.812042 | -2.030334 | -0.000076 |
| F  | -0.938248 | -3.767181 | 0.000488  |
| F  | -2.156097 | -0.240280 | -0.000473 |
| H  | 2.156952  | -0.026230 | -0.000412 |
| H  | 0.043427  | 3.767166  | -0.000443 |
| H  | -2.156937 | 2.461975  | -0.000473 |

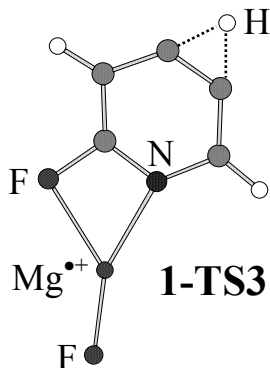

|    |           |           |           |
|----|-----------|-----------|-----------|
| N  | 0.060730  | 0.158951  | 0.006638  |
| C  | 1.319336  | 0.672073  | 0.006638  |
| C  | 1.367691  | 2.059555  | 0.050873  |
| C  | 0.273651  | 2.820786  | 0.072281  |
| C  | -1.045288 | 2.355637  | 0.064240  |
| C  | -0.998062 | 0.974731  | 0.034058  |
| F  | -2.156418 | 0.200394  | 0.025208  |
| Mg | -0.995667 | -1.667664 | -0.028580 |
| F  | -1.221710 | -3.393890 | -0.077942 |
| H  | 2.156418  | -0.015335 | -0.024445 |
| H  | -1.961456 | 2.933640  | 0.077942  |
| H  | 1.483658  | 3.393890  | 0.053726  |

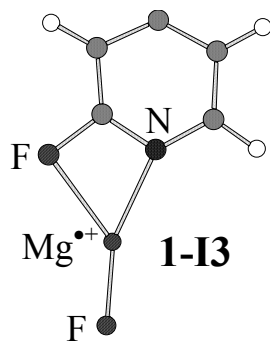

|    |           |           |           |
|----|-----------|-----------|-----------|
| C  | -1.107819 | 1.206848  | 0.006180  |
| N  | 0.000870  | 0.475510  | 0.006180  |
| C  | 1.196716  | 1.115097  | 0.016586  |
| C  | 1.259903  | 2.509415  | 0.026993  |
| C  | 0.045151  | 3.165390  | 0.026062  |
| C  | -1.207581 | 2.583160  | 0.015762  |
| Mg | -0.885925 | -1.428543 | -0.013794 |
| F  | -1.011215 | -3.165390 | -0.035339 |
| F  | -2.214706 | 0.374832  | -0.005371 |
| H  | 2.086563  | 0.494339  | 0.016373  |
| H  | 2.214706  | 3.024734  | 0.035324  |
| H  | -2.154343 | 3.113144  | 0.015045  |

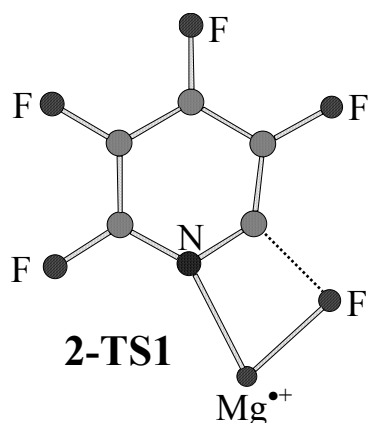

|    |           |           |           |
|----|-----------|-----------|-----------|
| N  | -0.049881 | -1.069031 | -0.015808 |
| C  | -1.216400 | -0.413666 | 0.035217  |
| C  | -1.230103 | 0.979691  | 0.059326  |
| C  | -0.008621 | 1.676224  | 0.028732  |
| C  | 1.210052  | 0.970230  | -0.025146 |
| C  | 1.049759  | -0.386978 | -0.042221 |
| F  | 2.344467  | -1.692657 | -0.109787 |
| Mg | 0.938019  | -2.990845 | -0.082672 |
| F  | 2.371796  | 1.596298  | -0.054733 |
| F  | -0.016907 | 2.990829  | 0.050934  |
| F  | -2.371796 | 1.643295  | 0.109787  |
| F  | -2.327286 | -1.119873 | 0.061400  |

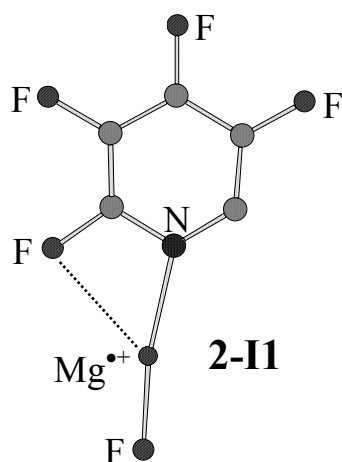

|    |           |           |           |
|----|-----------|-----------|-----------|
| C  | 1.207291  | 1.894638  | 0.085373  |
| C  | 1.089859  | 0.524017  | 0.066162  |
| N  | -0.043457 | -0.148849 | -0.016296 |
| C  | -1.185287 | 0.556183  | -0.088013 |
| C  | -1.224258 | 1.939896  | -0.079315 |
| C  | 0.003387  | 2.622818  | 0.009598  |
| Mg | -0.511200 | -2.197647 | -0.064835 |
| F  | -0.604767 | -3.932098 | -0.085403 |
| F  | -2.285507 | -0.206314 | -0.168961 |
| F  | -2.363495 | 2.598618  | -0.151245 |
| F  | 0.016205  | 3.932083  | 0.021210  |
| F  | 2.363495  | 2.520218  | 0.168961  |

S-3. Geometries and Cartesian coordinates of isomers of  $C_5H_3N^{\bullet+}$  and  $C_5F_3N^{\bullet+}$  for the complexes **1** and **2**, respectively. Relative energies of isomers are also shown for  $C_5H_3N^{\bullet+}$ .

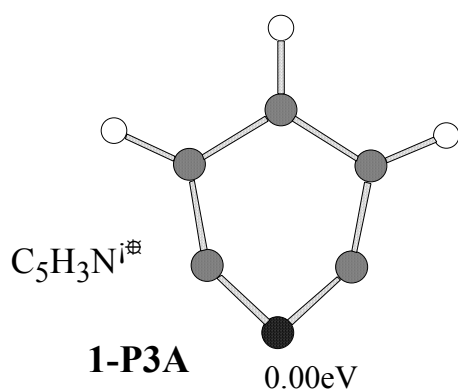

|   |          |           |           |
|---|----------|-----------|-----------|
| C | 0.000000 | 0.000000  | 0.000000  |
| N | 0.000000 | 1.297762  | 0.000000  |
| C | 1.293115 | 1.407474  | 0.000000  |
| C | 2.446986 | 0.688028  | -0.000737 |
| C | 2.176378 | -0.701541 | -0.001074 |
| C | 0.814621 | -1.088829 | -0.000497 |
| H | 3.438867 | 1.126127  | -0.001180 |
| H | 2.978472 | -1.438172 | -0.001604 |
| H | 0.461870 | -2.114176 | -0.000631 |

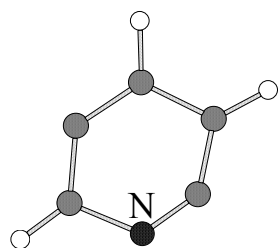

**1-P3B**  $-0.18$  eV

|   |           |           |           |
|---|-----------|-----------|-----------|
| C | -0.051132 | 0.844100  | 0.000168  |
| C | 1.226593  | 0.203537  | 0.000168  |
| C | 0.947998  | -1.136642 | 0.000168  |
| N | -0.036300 | -1.830627 | 0.000900  |
| C | -1.309357 | -1.293091 | -0.000137 |
| C | -1.198807 | 0.072678  | 0.000427  |
| H | -0.078659 | 1.932709  | -0.000656 |
| H | 2.181519  | 0.712219  | -0.000610 |
| H | -2.181503 | -1.932693 | -0.000885 |

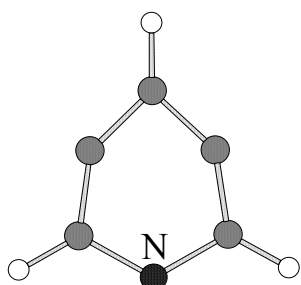

**1-P3C**  $+0.36$  eV

|   |           |           |           |
|---|-----------|-----------|-----------|
| C | -0.027130 | 0.937241  | 0.002426  |
| C | 0.960709  | 0.003418  | 0.002426  |
| C | 1.166306  | -1.345947 | 0.002426  |
| N | 0.001343  | -2.023895 | 0.000275  |
| C | -1.176331 | -1.368469 | -0.001450 |
| C | -0.996445 | -0.015396 | -0.000183 |
| H | -0.036697 | 2.023911  | 0.002655  |
| H | 2.114624  | -1.869537 | 0.003906  |
| H | -2.114624 | -1.909683 | -0.003922 |

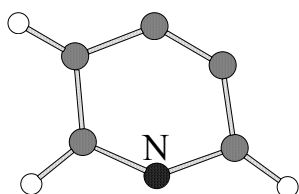

**1-P3D**  $+0.64$  eV

|   |           |           |           |
|---|-----------|-----------|-----------|
| C | 0.022995  | 1.298111  | 0.000137  |
| C | 1.133789  | 0.653381  | 0.000137  |
| C | 1.331894  | -0.699646 | 0.000137  |
| N | 0.067810  | -1.157028 | -0.000229 |
| C | -1.146744 | -0.606735 | 0.000092  |
| C | -1.265976 | 0.796921  | 0.000198  |
| H | 2.201126  | -1.344574 | -0.000092 |
| H | -1.989243 | -1.295059 | 0.000229  |
| H | -2.201126 | 1.344589  | 0.000229  |

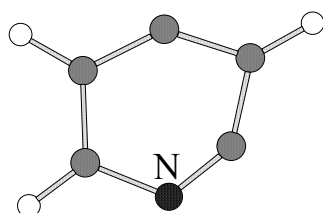

**1-P3E**  $-0.45$  eV

|   |           |           |          |
|---|-----------|-----------|----------|
| C | -0.037537 | 1.293289  | 0.000000 |
| C | 1.269073  | 0.858261  | 0.000000 |
| C | 0.977325  | -0.485336 | 0.000000 |
| N | 0.037857  | -1.255737 | 0.000000 |
| C | -1.224777 | -0.732849 | 0.000000 |
| C | -1.270035 | 0.671936  | 0.000000 |
| H | 2.209991  | 1.395340  | 0.000000 |
| H | -2.082596 | -1.395355 | 0.000000 |
| H | -2.209976 | 1.215134  | 0.000000 |

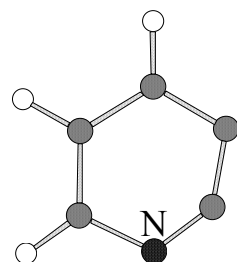

**1-P3F**  $+0.05$  eV

|   |           |           |           |
|---|-----------|-----------|-----------|
| C | 0.472855  | 0.839203  | 0.000000  |
| C | -0.737793 | 0.102509  | 0.000000  |
| C | -0.748169 | -1.296890 | 0.000000  |
| N | 0.488770  | -1.887344 | 0.000000  |
| C | 1.455353  | -1.158127 | 0.000015  |
| C | 1.686615  | 0.143219  | 0.000015  |
| H | 0.464981  | 1.928848  | 0.000000  |
| H | -1.686600 | 0.631378  | -0.000015 |
| H | -1.627304 | -1.928833 | -0.000015 |

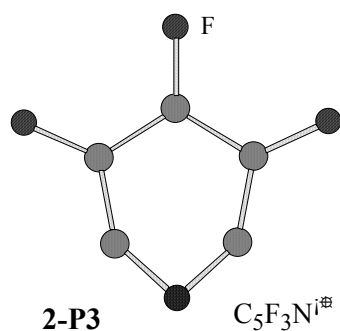

|   |           |           |           |
|---|-----------|-----------|-----------|
| C | -1.222397 | -0.000107 | 0.090286  |
| C | -0.910706 | -1.337814 | 0.104004  |
| N | 0.102356  | -1.983612 | 0.058075  |
| C | 1.294968  | -1.399750 | -0.028885 |
| C | 1.278915  | -0.010025 | -0.061905 |
| C | 0.027924  | 0.677567  | -0.002487 |
| F | 2.375427  | 0.700806  | -0.146118 |
| F | 0.015381  | 1.983627  | -0.033676 |
| F | -2.375427 | 0.589172  | 0.146118  |

S-4. Geometries and Cartesian coordinates of transition states and intermediate involved in the decomposition of  $C_5H_3N^{\bullet+}$ .

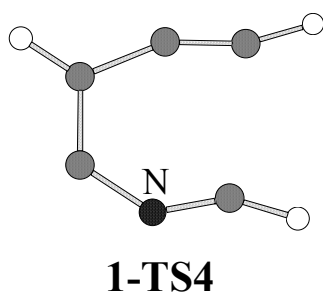

|   |           |           |           |
|---|-----------|-----------|-----------|
| C | -0.028900 | 1.216202  | -0.034897 |
| C | -1.324753 | 0.683044  | 0.063293  |
| C | -1.328476 | -0.672897 | 0.160660  |
| N | -0.217285 | -1.391907 | 0.160660  |
| C | 0.957047  | -1.182755 | 0.091782  |
| C | 1.203186  | 1.192917  | -0.090469 |
| H | -2.233597 | 1.278275  | 0.062286  |
| H | 1.994141  | -1.486908 | 0.066666  |
| H | 2.233612  | 1.486893  | -0.160660 |

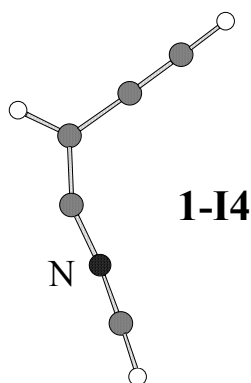

|   |           |           |           |
|---|-----------|-----------|-----------|
| C | -0.016510 | -2.370392 | 0.043594  |
| N | -0.419846 | -1.263306 | 0.015366  |
| C | -0.965591 | -0.120834 | -0.015839 |
| C | -0.997009 | 1.213806  | -0.038971 |
| C | 0.153595  | 2.020370  | -0.026260 |
| C | 1.124863  | 2.749115  | -0.017715 |
| H | 0.306152  | -3.396927 | 0.069077  |
| H | -1.977570 | 1.694595  | -0.069077 |
| H | 1.977570  | 3.396912  | -0.008636 |

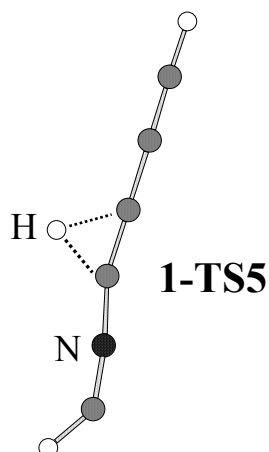

|   |           |           |           |
|---|-----------|-----------|-----------|
| C | 0.951248  | 2.905106  | 0.086075  |
| C | 0.586945  | 1.740829  | 0.075638  |
| C | 0.189819  | 0.455658  | 0.064697  |
| C | -0.201385 | -0.753600 | 0.052231  |
| N | -0.250549 | -2.036758 | 0.089645  |
| C | -0.447495 | -3.225250 | 0.103516  |
| H | 1.277176  | 3.926865  | 0.096069  |
| H | -1.277176 | -3.926865 | 0.012390  |
| H | -1.129883 | 0.076553  | -0.103531 |

S-5. Relative energies of the chain and cyclic forms of  $C_5H_3N^{\bullet+}$  and  $C_5F_3N^{\bullet+}$ .

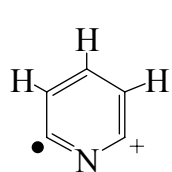

*0.00eV*  
**1-P3A**

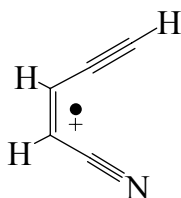

*-0.35eV*  
**1-P3G**

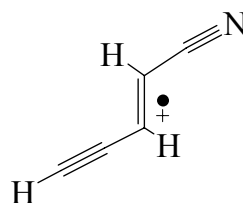

*-0.38eV*  
**1-P3H**

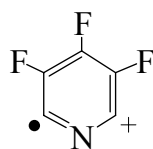

*0.99eV*  
**2-P3**

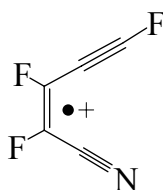

*0.01eV*  
**2-P3A**

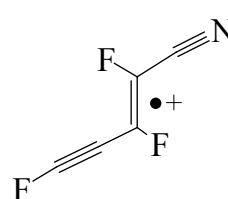

*0.00eV*  
**2-P3B**

S-6. Energetics of H- and F-transfer in 1-P3G and 2, respectively.

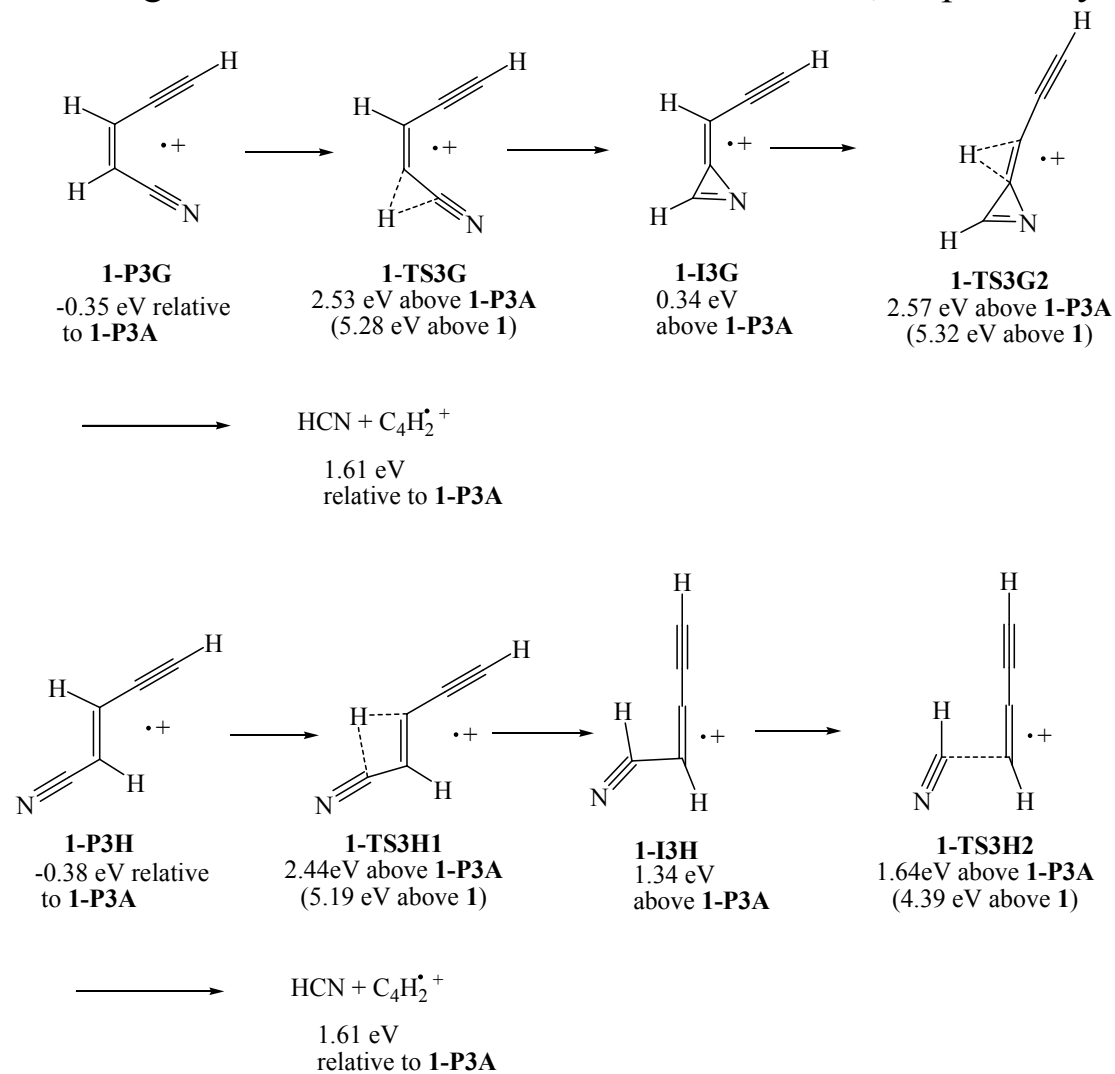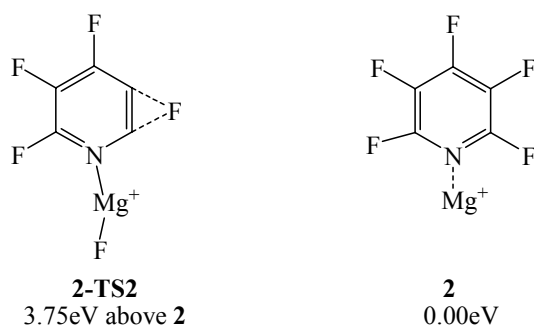



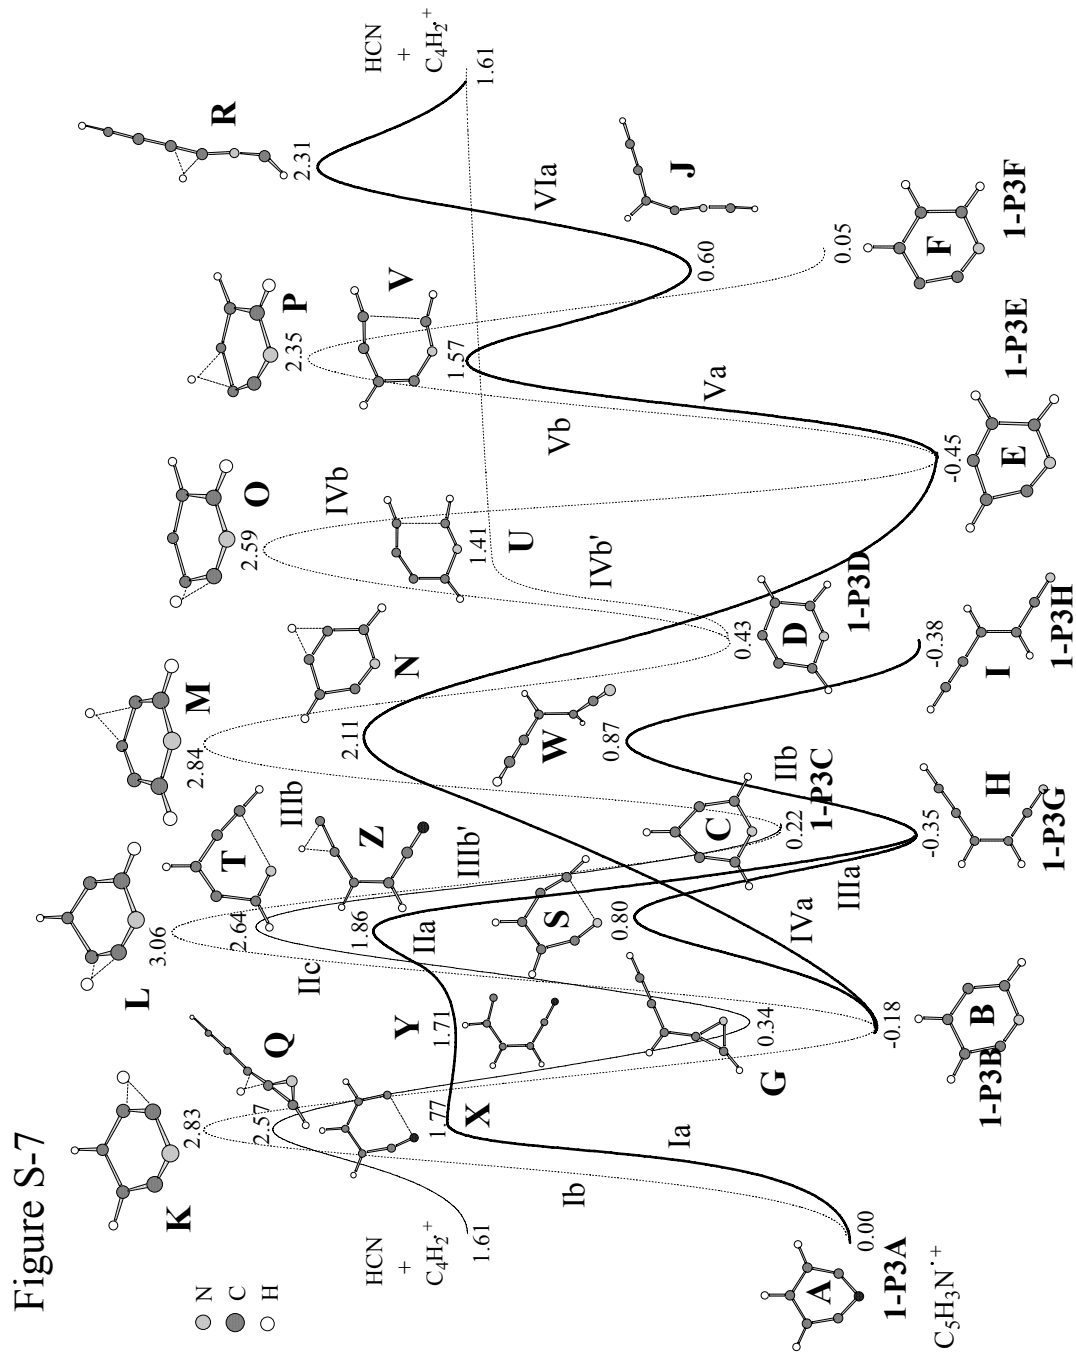

S-8. Artificial asymmetric structures of the pyridyne radical cations: Comparison of calculations using B3LYP and other pure DFT, such as BLYP, BP86 and BPW91.

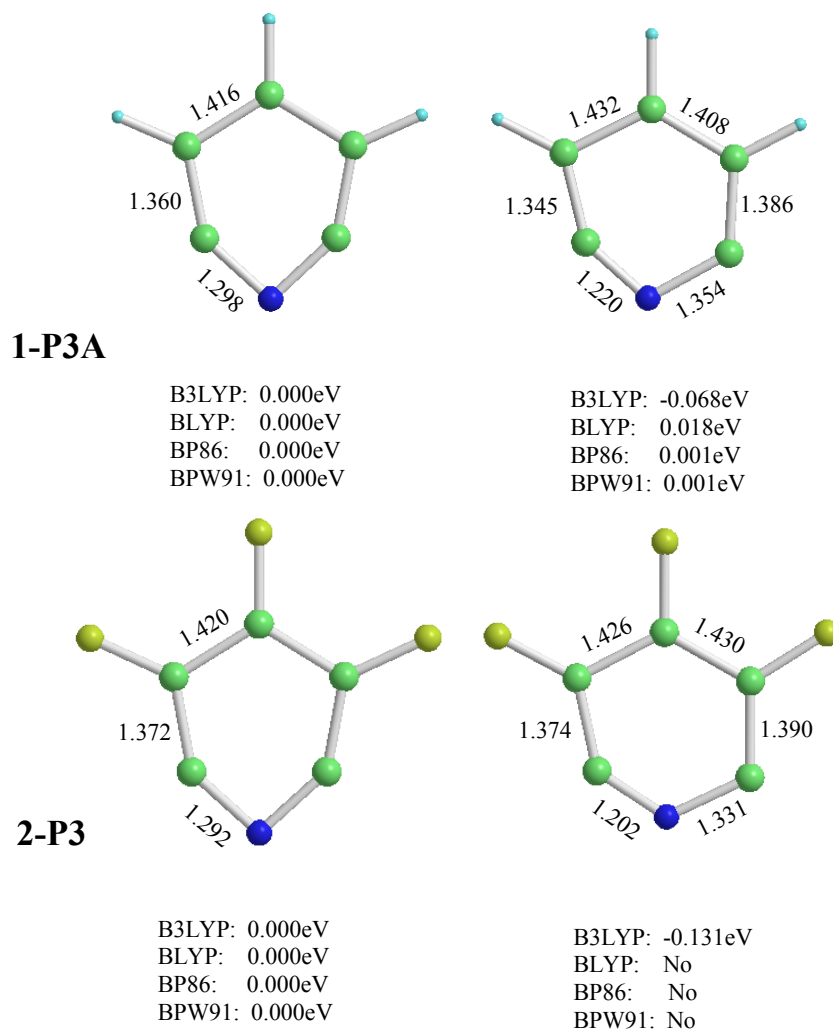

The bond lengths shown in the figure are optimized with B3LYP. No asymmetric **2-P3** was located with pure DFT method.

The two structures lie on a very flat potential surface, in which the symmetry-breaking problems may easily occur. In this case, the symmetry-breaking problem is caused by the hybrid B3LYP method. The artificial asymmetric structures can be ruled out based on evidence of the pure DFT calculation. Because no other symmetric structures are involved in the reaction pathway, we still believe that B3LYP is reliable on the ground-state calculation of this system.
